# Supplementary material for: Significantly increased Raman enhancement enabled by hot-electron-injection-induced synergistic resonances on anisotropic ReS2 films
Source: Royal Society of Chemistry journal article supplement (doi:10.1039/d2cp04703a), 2023-01-01
Supplement: d2cp04703a1.pdf [file d2cp04703a1.pdf]

## Supporting Information

# Significantly Increased Raman Enhancement Enabled by Hot-Electron-Injection-Induced Synergistic Resonances on Anisotropic ReS<sub>2</sub> Films

Wen Pan<sup>a, #</sup>, Shuyi Wu<sup>a, #</sup>, Chunlan Ma<sup>a, \*</sup>, Yun Shan<sup>\*, b</sup> and Lizhe Liu<sup>c, \*</sup>

<sup>a</sup>Jiangsu Key Laboratory of Micro and Nano Heat Fluid Flow Technology and Energy Application, School of Physical Science and Technology, Suzhou University of Science and Technology, Suzhou, 215009, China

<sup>b</sup> Key Laboratory of Advanced Functional Materials of Nanjing, Nanjing Xiaozhuang University, Nanjing 211171, China

<sup>c</sup> National Laboratory of Solid State Microstructures and School of Physics, Nanjing University, Nanjing 210093, PR China

\*Corresponding authors. E-mail: [wlxmcl@usts.edu.cn](mailto:wlxmcl@usts.edu.cn) (C.L.M), [yshan@njxzc.edu.cn](mailto:yshan@njxzc.edu.cn) (Y.S), [lzliu@nju.edu.cn](mailto:lzliu@nju.edu.cn) (L.Z.L)

<sup>#</sup>Author Contributions. Wen Pan and Shuyi Wu contributed equally to this work.

### Supplementary Methods

Calculation of the enhancement factor. The EF is calculated according to the following formula:

$$EF = \frac{I_{SERS} / N_{SERS}}{I_{norm} / N_{norm}}$$

$$N_{SERS} = \frac{CVN_A A_{Raman}}{A_{Sub}}$$

$$N_{norm} = \frac{\rho h A_{Raman} N_A}{M}$$

$I_{SERS}$  and  $I_{norm}$  are the intensities of the selected Raman peak in SERS spectra and normal Raman spectra, respectively.  $N_{SERS}$  and  $N_{norm}$  are the number of molecules in the testing area of SERS and normal Raman measurements, respectively. The data of bulk RhB is used as normal Raman spectrum reference. For the SERS measurement, the intensity is taken the average of 10 random spots, and the number of molecules is estimated by the second equation on the assumption that the molecules are distributed uniformly on the substrate.  $C$  is the molar concentration of RhB solution and  $V$  is the volume of the droplet (10  $\mu$ L).  $N_A$  is Avogadro constant.  $A_{Raman}$  is the laser spot area.  $A_{Sub}$  is the effective area of the substrate, which is approximately  $\pi/4 \text{ cm}^2$ . The confocal depth  $h$  of the laser beam is  $\sim 21 \text{ }\mu\text{m}$ . The molecular weight  $M$  of RhB is  $479 \text{ g mol}^{-1}$  and density  $\rho$  of bulk RhB is  $0.79 \text{ g cm}^{-3}$ .

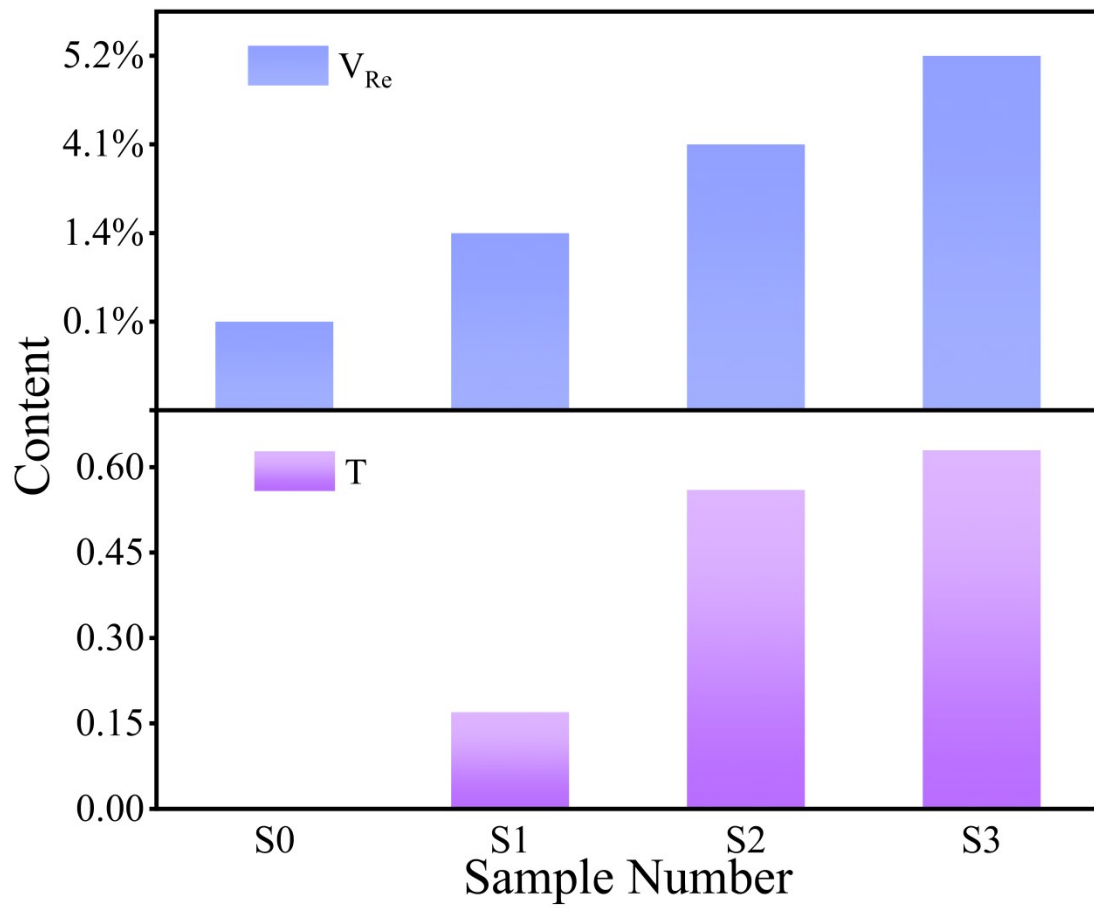

**Fig. S1.** The concentration of Re vacancy and T phase R6G acquired from S0 to S3.

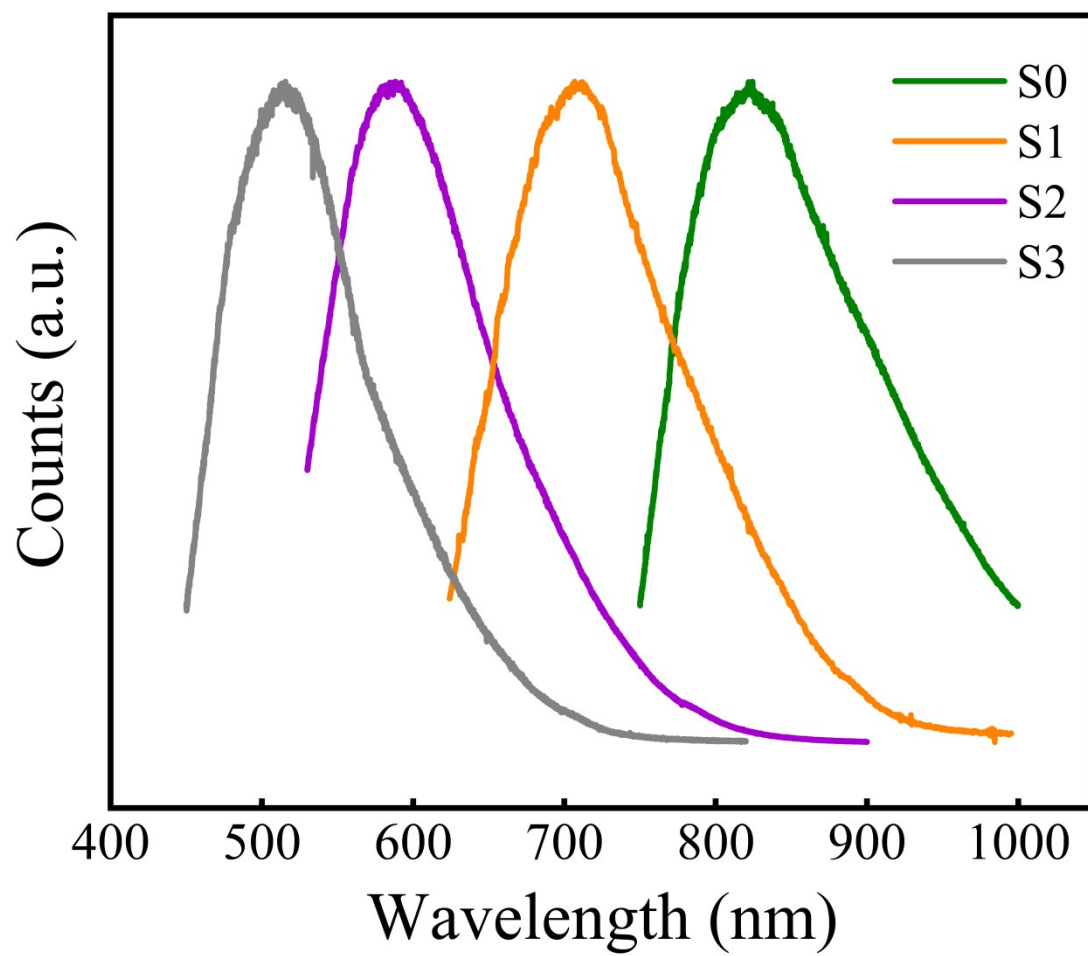

**Fig. S2.** PL spectra obtained from S0 to S3.

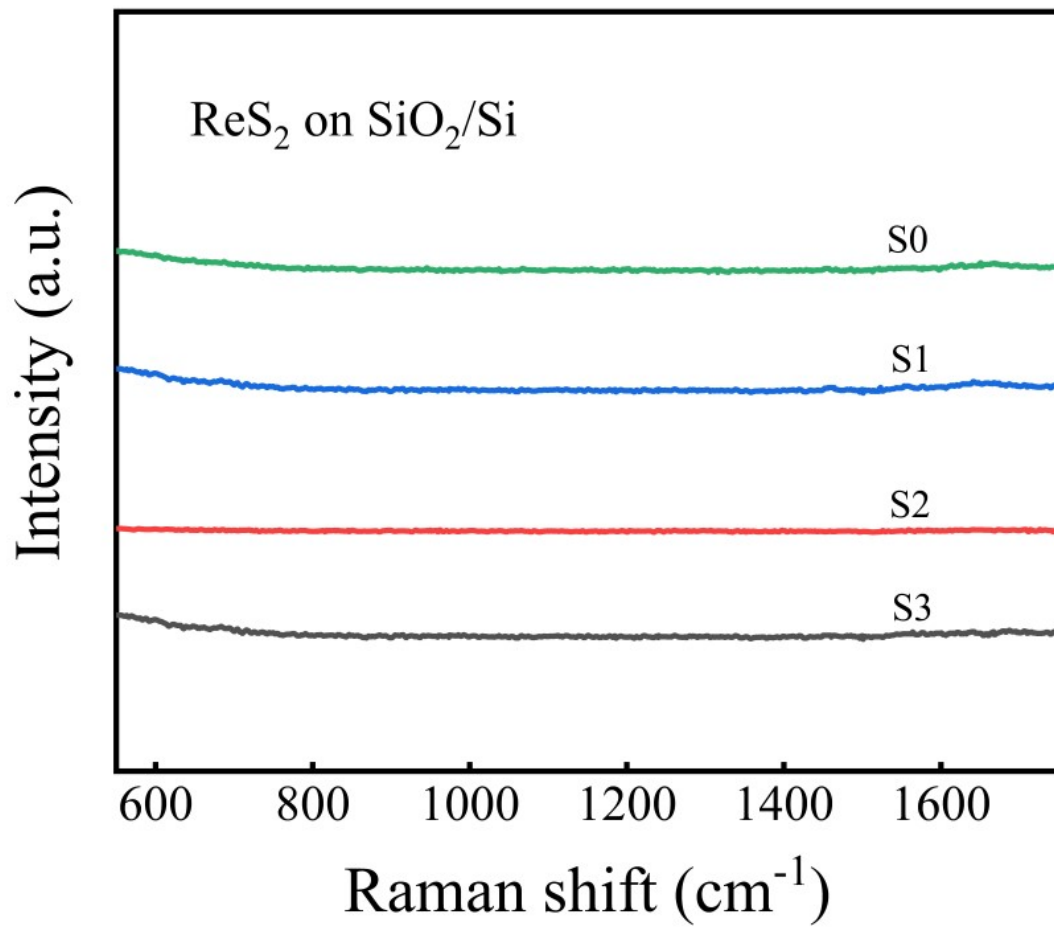

Fig. S3. The Raman spectra of bare ReS<sub>2</sub> of different phases in the range of 550-1750 cm<sup>-1</sup>

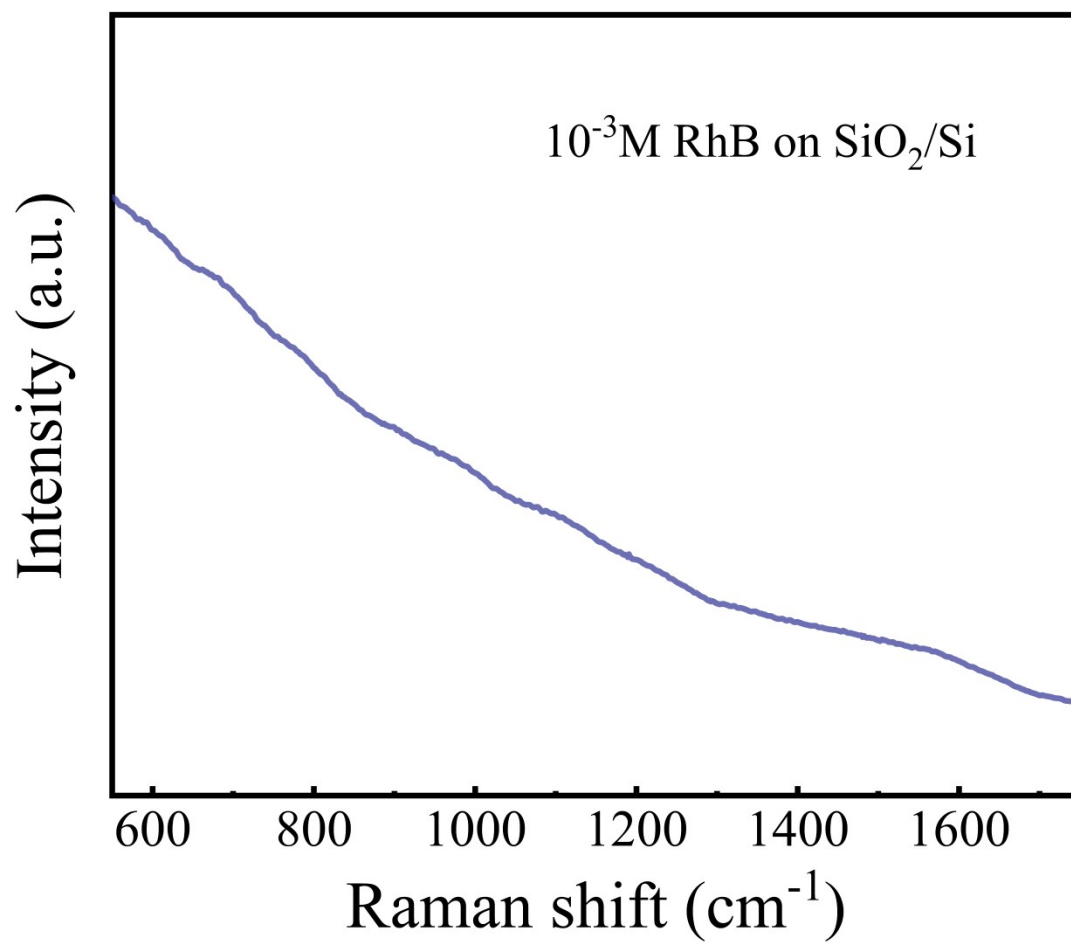

**Fig. S4.** Raman spectrum of RhB molecules on the SiO<sub>2</sub>/Si substrate.

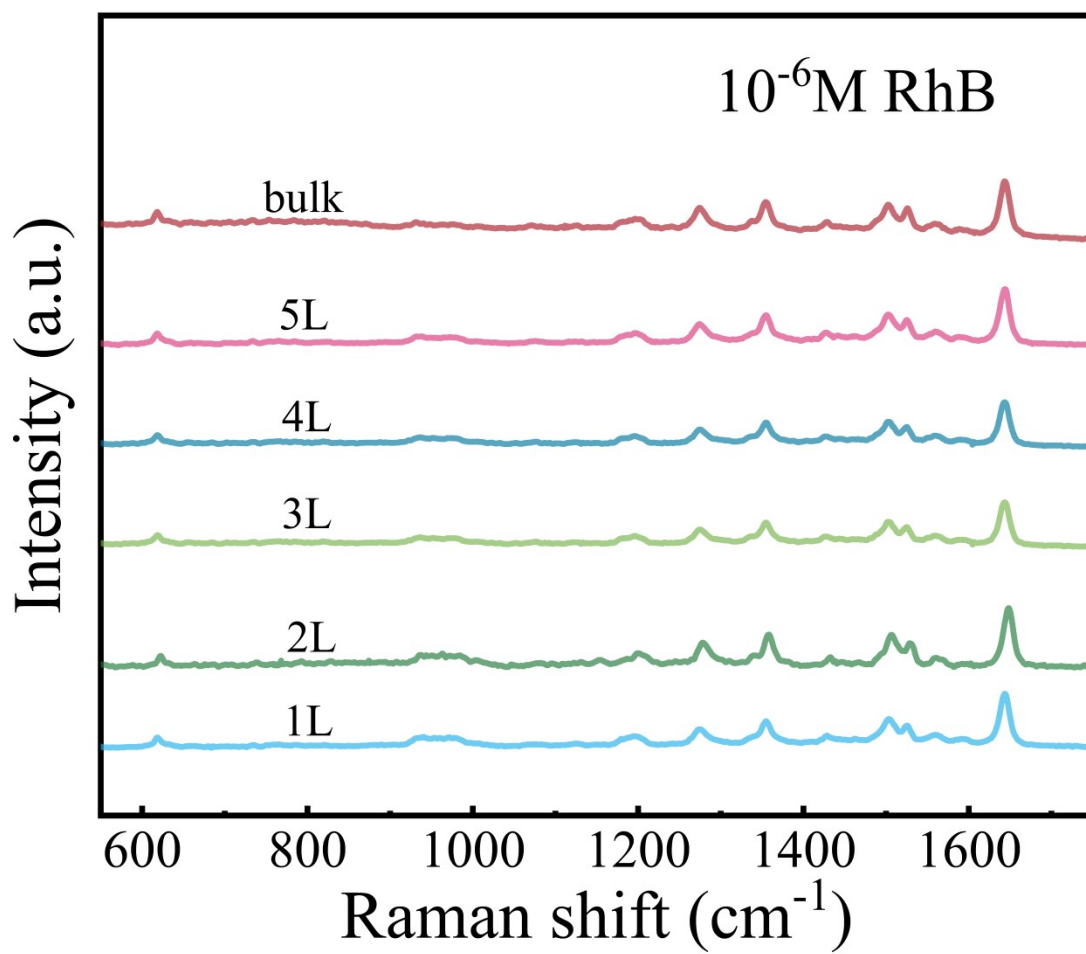

**Fig. S5.** Raman spectra of RhB molecules ( $10^{-6}$  M) on S2 varying from monolayer to thick layers.

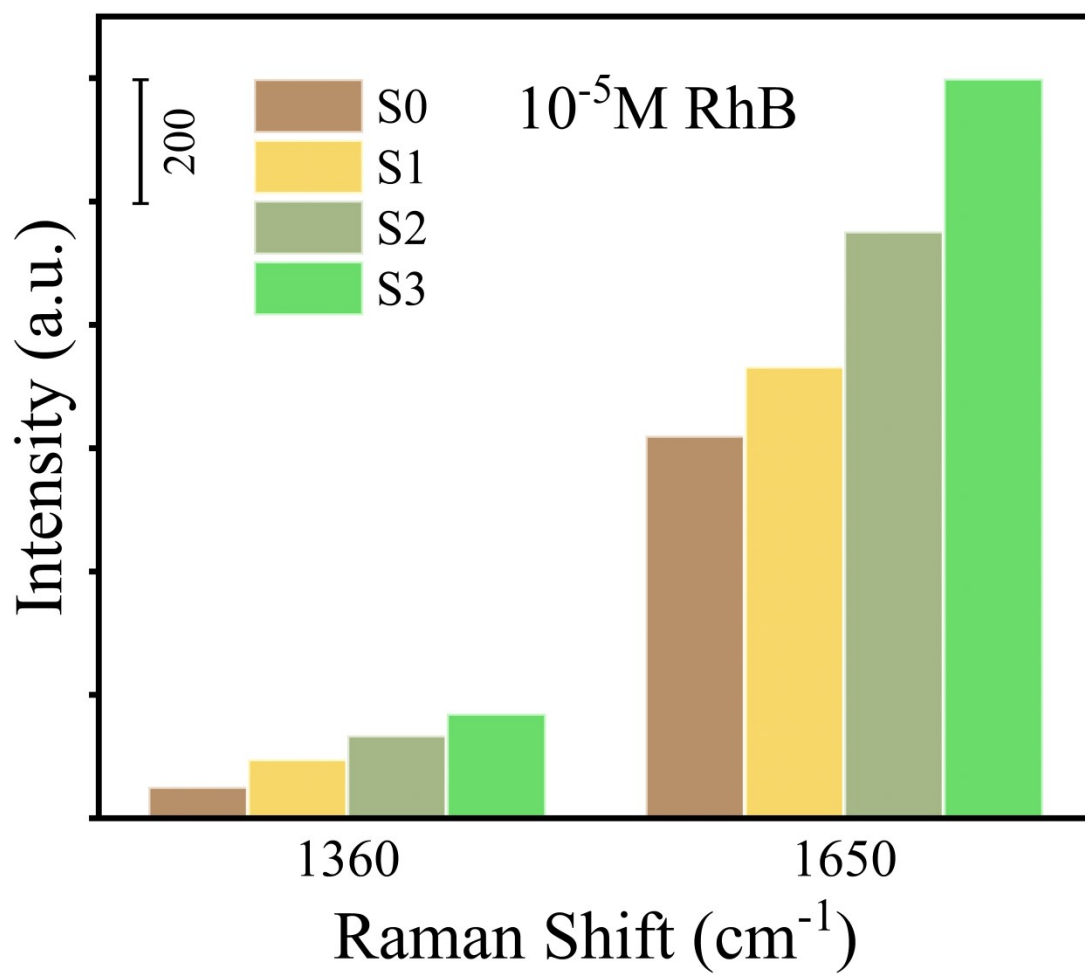

**Fig. S6.** SERS intensity columns derived from the enhanced Raman spectra of 10<sup>-5</sup> M RhB obtained from S0 to S3 under the 488 nm laser excitation.



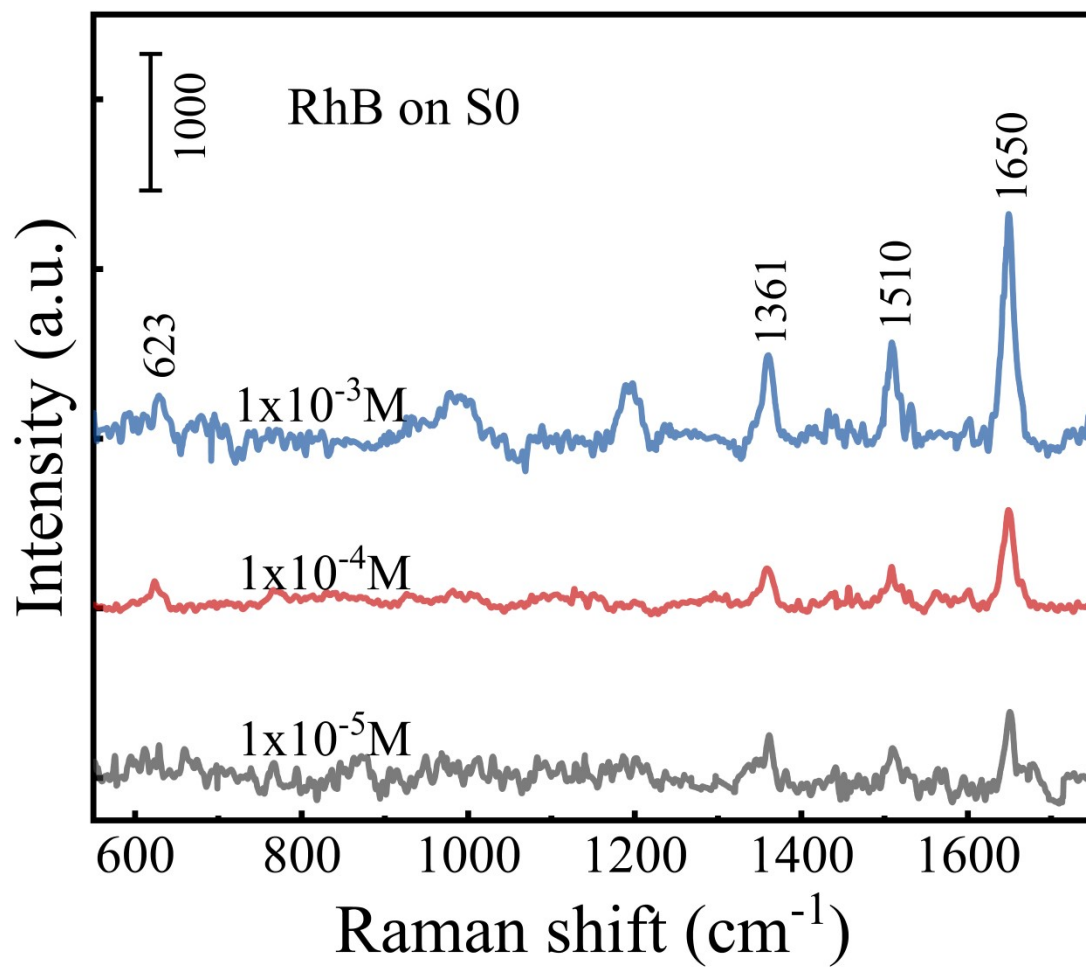

**Fig. S7.** SERS spectra of RhB acquired under different concentrations from  $10^{-3}$  to  $10^{-5} \text{ M}$  on S0.

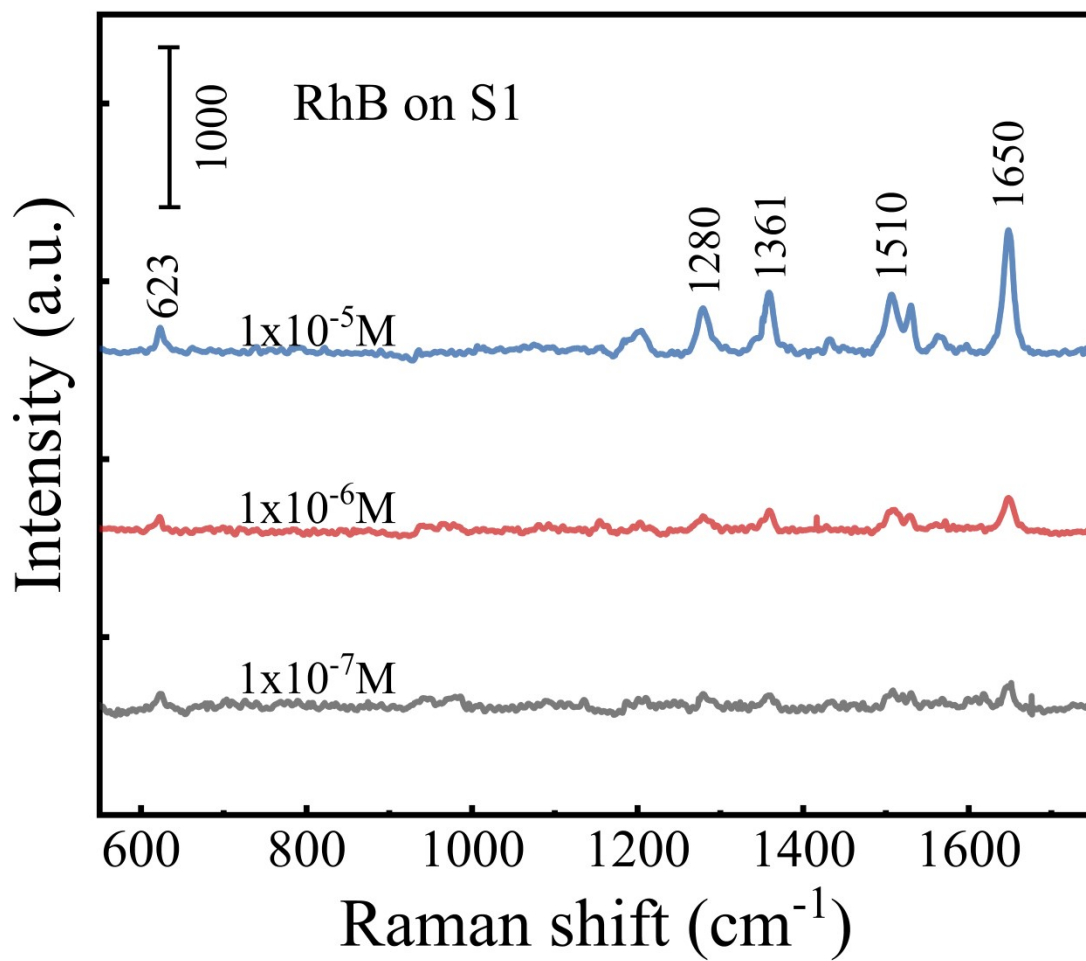

**Fig. S8.** SERS spectra of RhB acquired under different concentrations from  $10^{-5}$  to  $10^{-7} \text{ M}$  on S1.

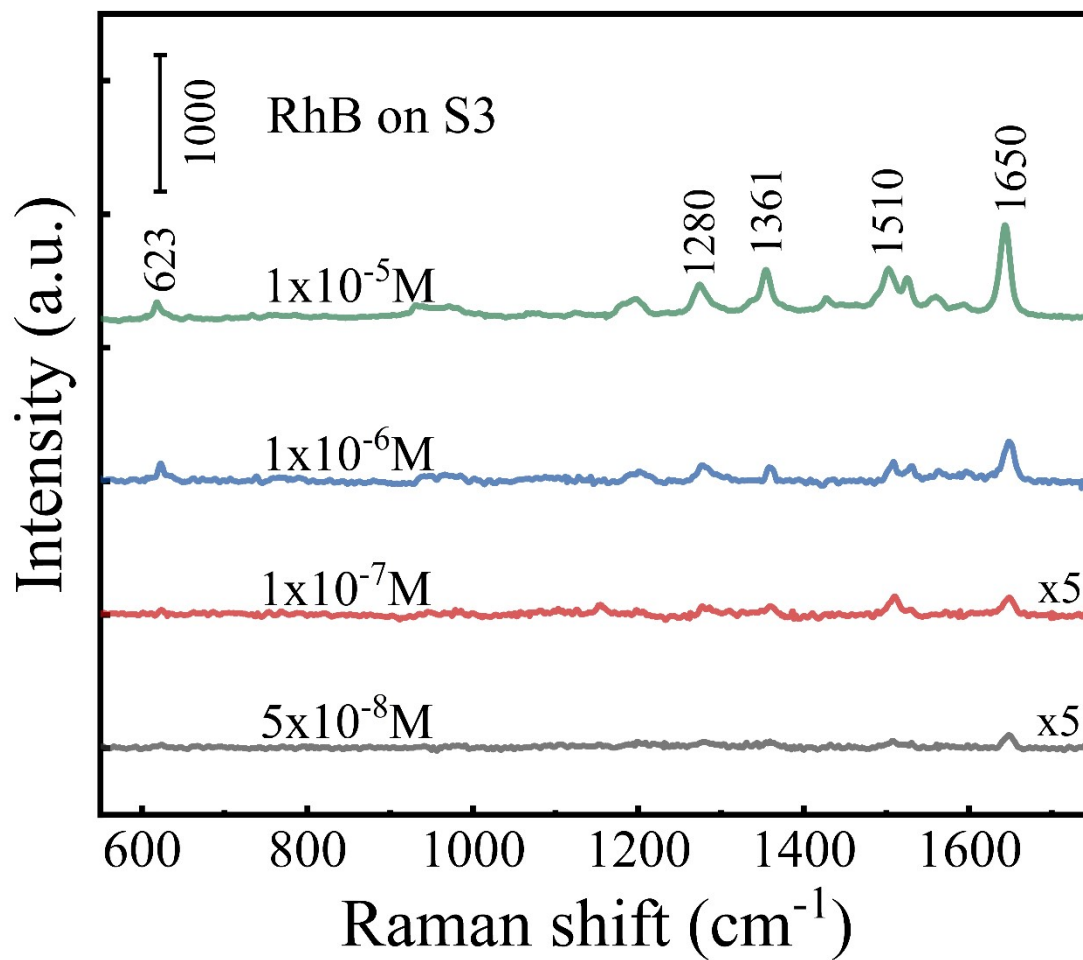

**Fig. S9.** SERS spectra of RhB acquired under different concentrations from  $10^{-5}$  to  $10^{-8}$  M on S3.

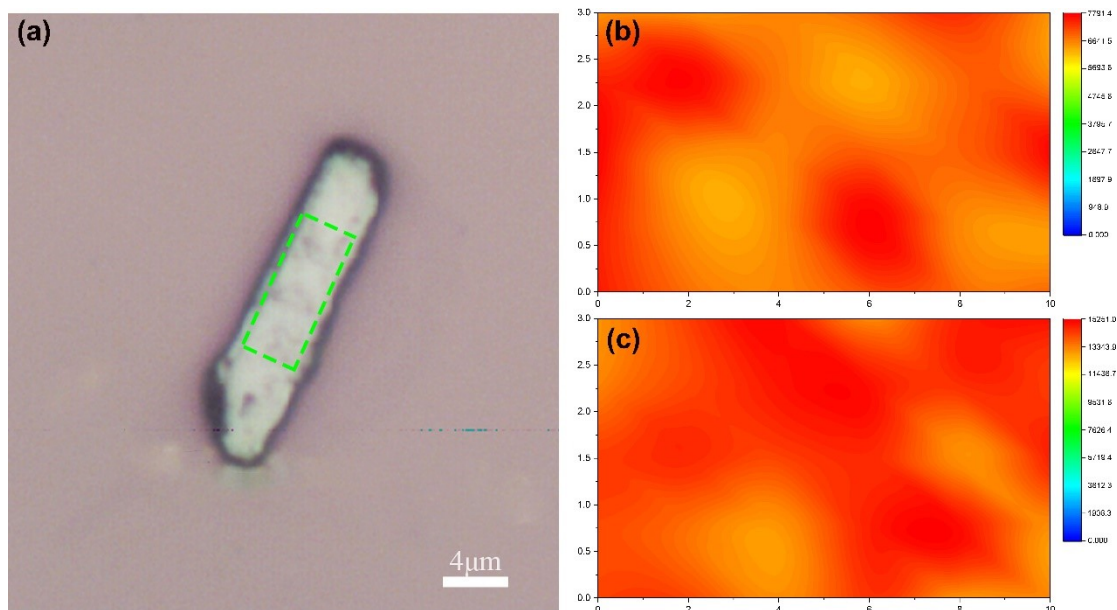

Fig. S10. (a) Optical microscopy image of T@Td ReS<sub>2</sub> (S2). The mapping area is marked in blue. (b, c) SERS maps from the marked area by analyzing the integrated intensity at 1360 cm<sup>-1</sup> and 1650 cm<sup>-1</sup>.

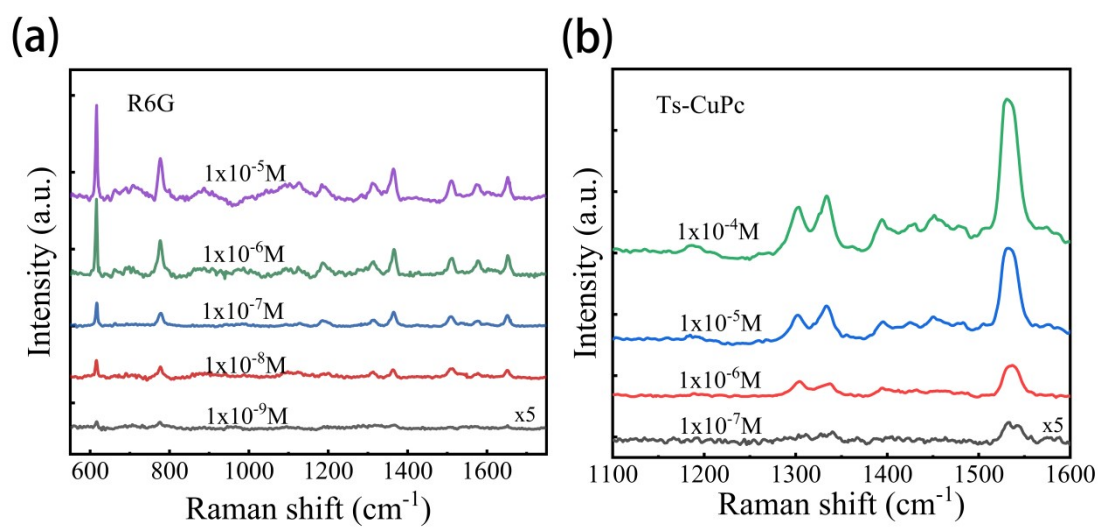

Fig.S11. (a, b) SERS spectra of R6G and CuPc molecules acquired under different concentrations from 10<sup>-5</sup> to 10<sup>-9</sup> M and 10<sup>-4</sup> to 10<sup>-7</sup> M on S2.

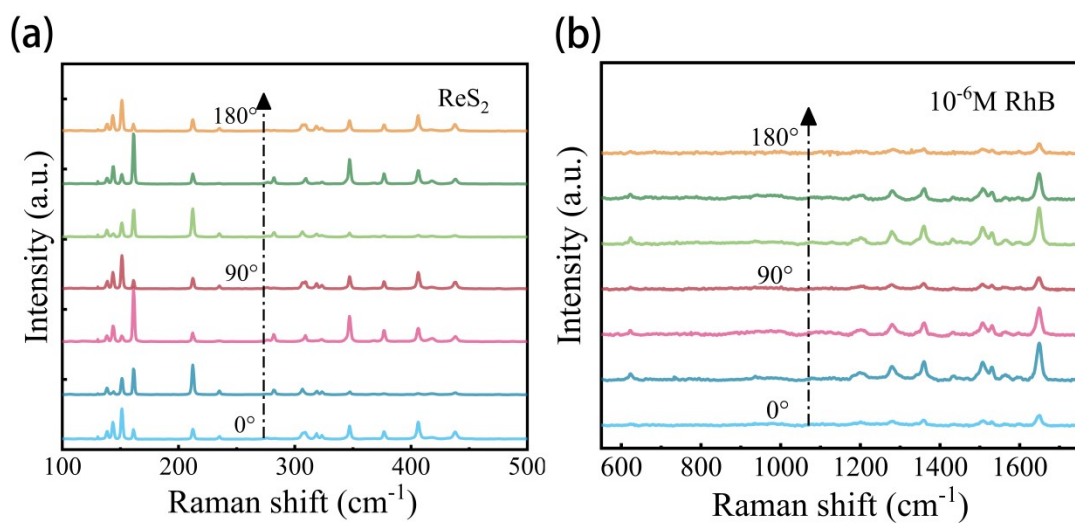

**Fig. S12.** (a, b) Polarized Raman spectra of  $\text{ReS}_2$  (left) and R6G molecules on S2 (right).

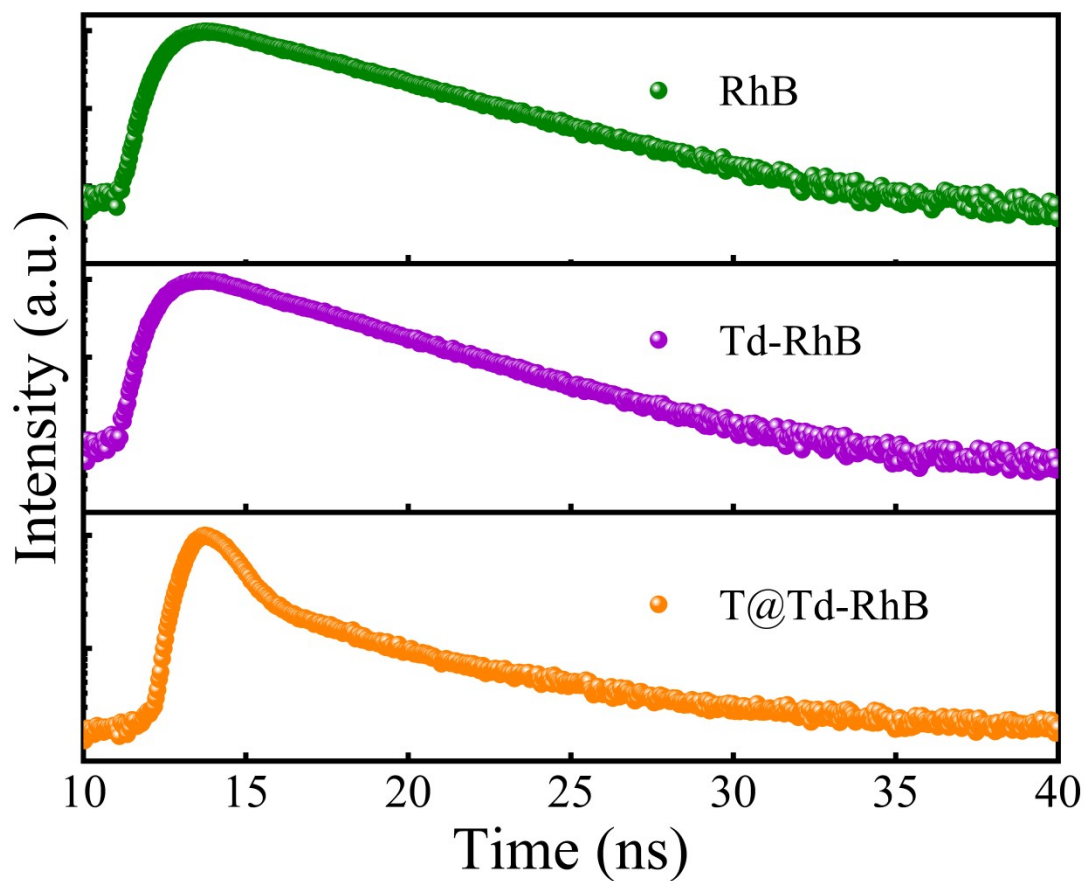

**Fig. S14.** Time-resolved photoluminescence spectra of pristine RhB solution, and RhB solutions mixed with Td-ReS<sub>2</sub> and T@Td-ReS<sub>2</sub> respectively.
